# Supplementary material
Source: PubMed Central journal article supplement (PMC9684019)
Supplement: NIHMS1850508-supplement-Supp.pdf [file NIHMS1850508-supplement-Supp.pdf]

Cell Reports, Volume 30

## Supplemental Information

### ***Vibrio cholerae*-Symbiont Interactions**

### **Inhibit Intestinal Repair in *Drosophila***

**David Fast, Kristina Petkau, Meghan Ferguson, Minjeong Shin, Anthony Galenza, Benjamin Kostiuik, Stefan Pukatzki, and Edan Foley**

## SUPPLEMENTAL INFORMATION

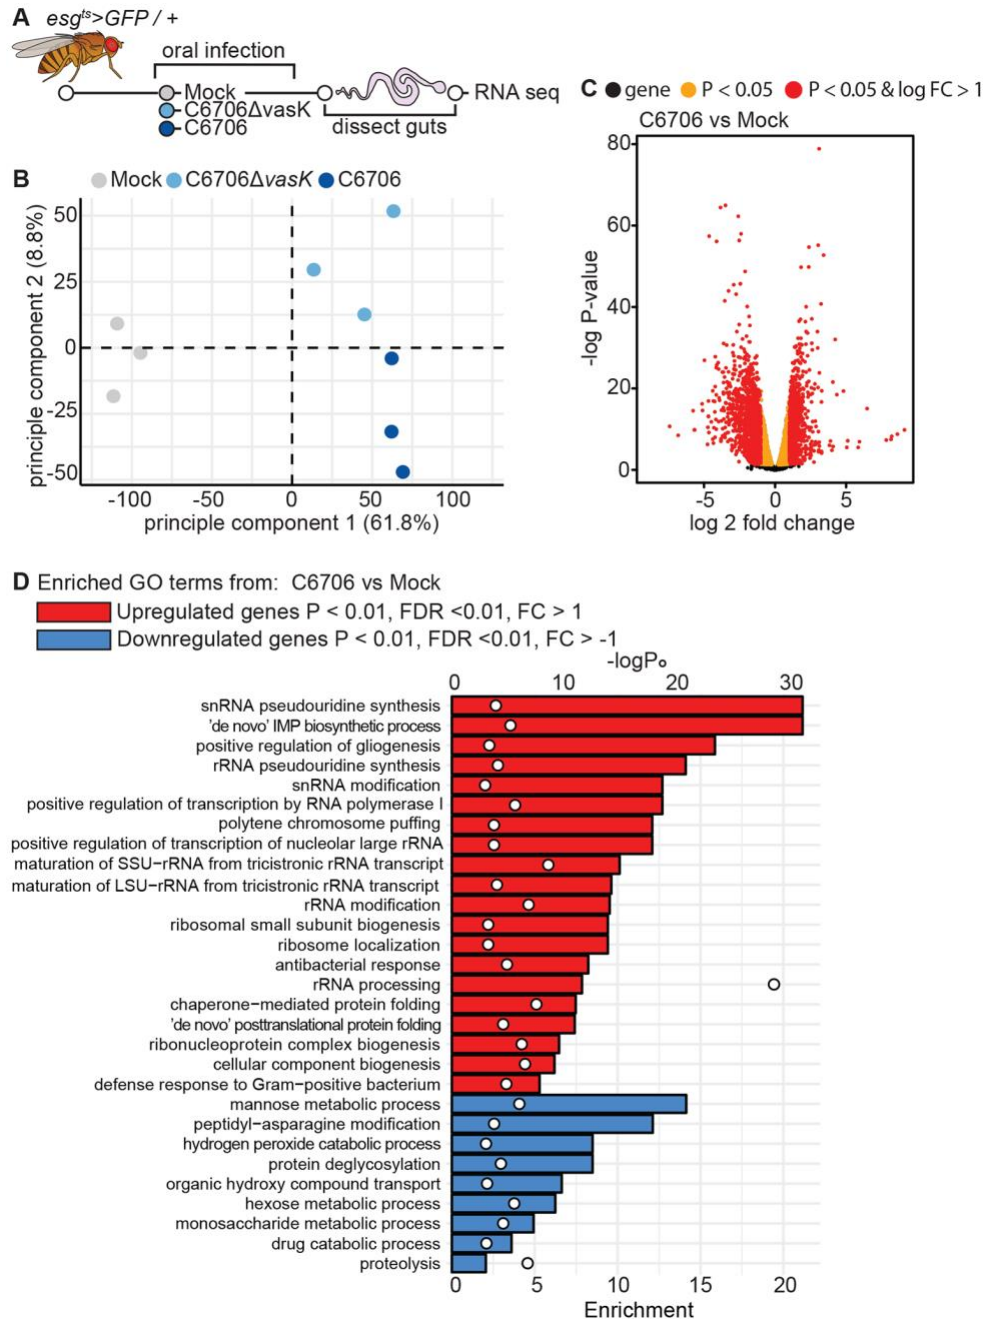

**Supplemental Figure 1. The T6SS modifies whole gut transcriptional responses to *V. cholerae*.** Related to figures 2 and 3. **(A)** Schematic representation of the RNA-sequencing of *V. cholerae* infected guts, n=10 guts per replicate. **(B)** Principle component analysis from the counts per million obtained from RNA-sequencing of guts dissected from mock infected flies or flies infected with C6706 or C6706ΔvasK. **(C)** Volcano plots of differentially expressed genes from comparison of C6706 to Mock. Each dot represents a single gene. Yellow indicates a P<0.05 and red indicates P<0.05 and log<sub>2</sub> fold change >1 or <-1. **(D)** Gene Ontology (GO) analysis from the top 500 up or down regulated differently expressed genes (P<0.01, false discovery rate (FDR) <0.01, and log<sub>2</sub> fold change >1 or <-1) from comparisons of C6706 to Mock. Bars (bottom X-axis) represent enrichment scores and circles (top X-axis) represent -logP values for each enriched GO term.

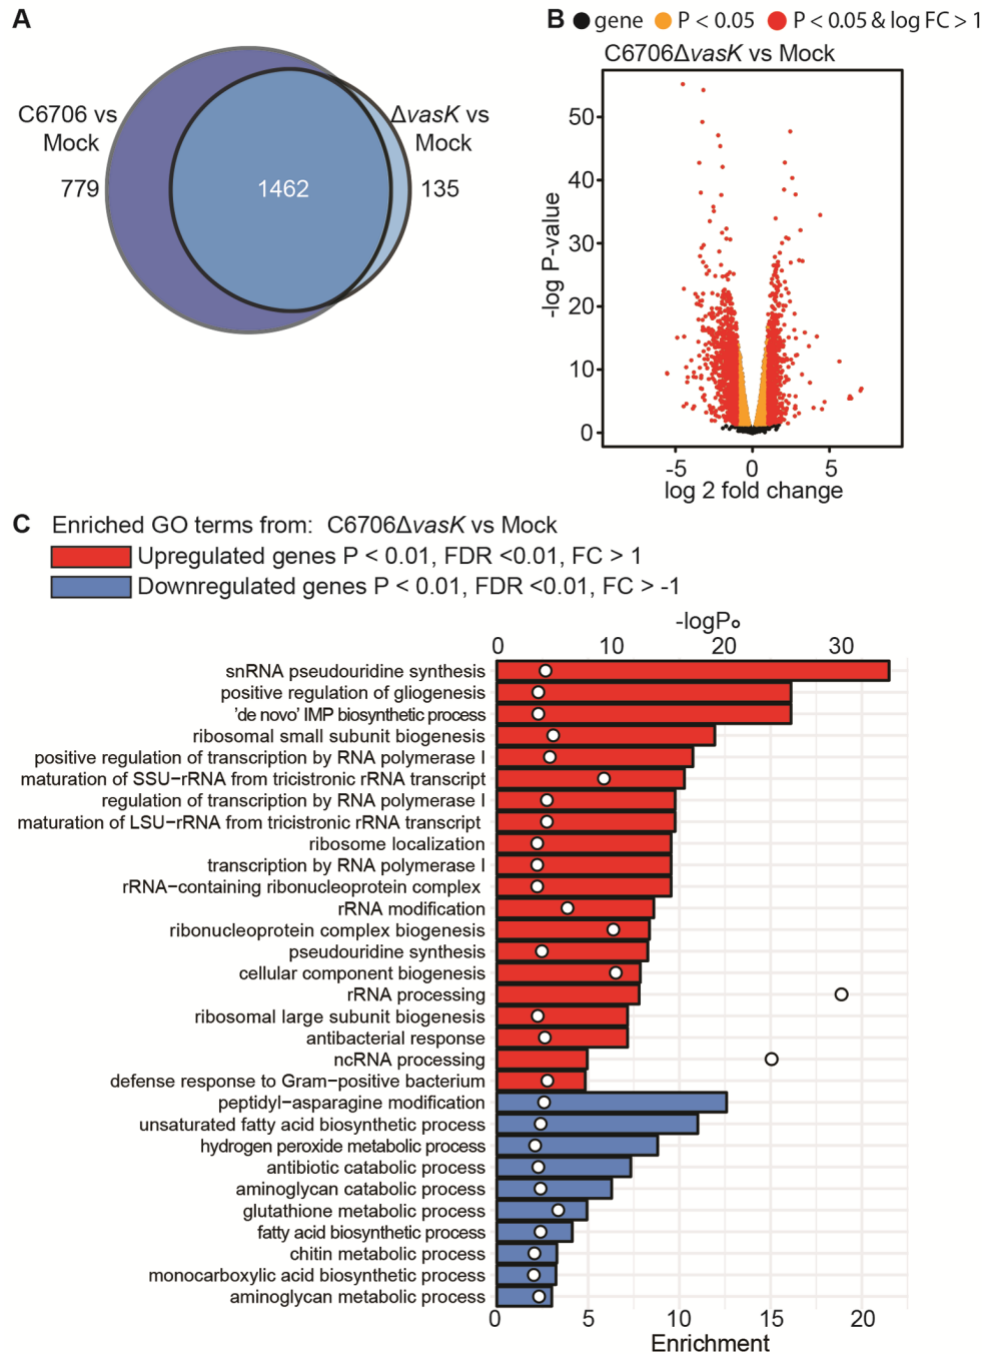

**Supplemental Figure 2. The gut transcriptional responses to C6706 $\Delta vasK$ .** Related to figures 2 and 3. **(A)** Venn diagram of differentially expressed genes ( $P < 0.01$ ,  $FDR < 0.01$ , and  $\log_2$  fold change  $> 1$  or  $< -1$ ) from comparisons of C6706 to Mock and C6706 $\Delta vasK$  to Mock. **(B)** Volcano plot of differentially expressed genes from comparison of C6706 $\Delta vasK$  to Mock. Each dot represents a gene. Yellow indicates a  $P < 0.05$  and red indicates  $P < 0.05$  and  $\log_2$  fold change  $> 1$  or  $< -1$ . **(C)** Gene Ontology (GO) analysis from the top 500 up or down regulated differently expressed genes ( $P < 0.01$ ,  $FDR < 0.01$ , and  $\log_2$  fold change  $> 1$  or  $< -1$ ) from comparisons of C6706 $\Delta vasK$  to Mock. Bars (bottom X-axis) represent enrichment scores and circles (top X-axis) represent  $-\log P$  values for each enriched GO term.

| gene         | fold change | function      | annotation             | gene         | fold change | function      | annotation       |
|--------------|-------------|---------------|------------------------|--------------|-------------|---------------|------------------|
| <i>wech</i>  | 2.05        | adhesion      | intergrin              | <i>Cdk1</i>  | 0.21        | cell cycle    | M phase          |
| <i>pasi2</i> | 2.04        | adhesion      | septate junction       | <i>Cdk4</i>  | 0.45        | cell cycle    | S phase          |
| <i>cold</i>  | 2.05        | adhesion      | septate junction       | <i>cort</i>  | 0.32        | cell cycle    | APC/C            |
| <i>ruX</i>   | 2.12        | cell cycle    | CDK inhibitor          | <i>PCNA2</i> | 0.34        | cell cycle    | S phase          |
| <i>Atg13</i> | 2.10        | metabolism    | autophagy              | <i>insc</i>  | 0.28        | cell division | asymmetric       |
| <i>Atg6</i>  | 2.00        | metabolism    | autophagy              | <i>msd1</i>  | 0.25        | cell division | spindle assembly |
| <i>Atg8a</i> | 2.05        | metabolism    | autophagy              | <i>Nnf1b</i> | 0.44        | cell division | kinetochore      |
| <i>cbt</i>   | 2.25        | signaling     | dpp                    | <i>pav</i>   | 0.15        | cell division | cytokinesis      |
| <i>dpp</i>   | 2.07        | signaling     | dpp                    | <i>tum</i>   | 0.25        | cell division | cytokinesis      |
| <i>lilli</i> | 2.16        | signaling     | dpp                    | <i>brk</i>   | 0.39        | signaling     | dpp              |
| <i>salm</i>  | 2.12        | signaling     | dpp                    | <i>Dh31</i>  | 0.41        | signaling     | diuretic hormone |
| <i>salr</i>  | 2.32        | signaling     | dpp                    | <i>Pvr</i>   | 0.45        | signaling     | RTK              |
| <i>tkv</i>   | 2.08        | signaling     | dpp                    | <i>Ror</i>   | 0.23        | signaling     | RTK              |
| <i>ebd1</i>  | 2.12        | signaling     | Wnt                    | <i>tor</i>   | 0.34        | signaling     | RTK              |
| <i>GATAe</i> | 2.02        | transcription | intestinal homeostasis |              |             |               |                  |

**Supplemental Figure 3. The T6SS promotes a unique transcriptional response from the intestine.** Related to figures 2 and 3. Representative genes involved in intestinal homeostasis, growth, and stress responses differentially regulated in response to C6706 relative to C6706 $\Delta$ *vasK* from RNA-seq of *Drosophila* whole guts.

| C6706       |             | C6706 $\Delta$ <i>vasK</i> |             | function              |
|-------------|-------------|----------------------------|-------------|-----------------------|
| gene        | fold change | gene                       | fold change |                       |
| <i>DptA</i> | 9.11        | <i>DptA</i>                | 7.06        | antimicrobial peptide |
| <i>Dro</i>  | 8.66        | <i>Dro</i>                 | 6.33        | antimicrobial peptide |
| <i>AttC</i> | 8.15        | <i>AttC</i>                | 6.44        | antimicrobial peptide |
| <i>DptB</i> | 7.82        | <i>DptB</i>                | 6.27        | antimicrobial peptide |
| <i>AttA</i> | 5.93        | <i>AttA</i>                | 4.68        | antimicrobial peptide |
| <i>Mtk</i>  | 5.85        | <i>Mtk</i>                 | 4.25        | antimicrobial peptide |
| <i>AttB</i> | 3.85        | <i>AttB</i>                | 2.78        | antimicrobial peptide |
| <i>AttD</i> | 2.52        | <i>AttD</i>                | —           | antimicrobial peptide |

fold change

2 10

**Supplemental Figure 4. Infection with *V. cholerae* promotes the transcription of antimicrobial peptides.** Related to figures 3 and supplemental figures 1 and 2. Antimicrobial peptide expressed from RNA-seq of *Drosophila* whole guts infected with C6706 or C6706 $\Delta$ *vasK*. Fold change was obtained from comparisons of C6706 to mock and C6706 $\Delta$ *vasK* to mock respectively.
